# Supplementary material for: A Comparative Analysis of China’s Anthropogenic CO 2 Emissions (2000–2023): Insights from Six Bottom-Up Inventories and Uncertainty Assessment
Source: Copernicus journal article supplement (doi:10.5194/egusphere-2025-3914), 2025-09-02
Supplement: Supplementary file 1 [file egusphere-2025-3914-supplement.pdf]

*Supplement of*

# **A Comparative Analysis of China's Anthropogenic CO<sub>2</sub> Emissions (2000–2023): Insights from Six Bottom-Up Inventories and Uncertainty Assessment**

**Huirong Yang et al.**

*Correspondence to:* Kai Wu ([kwu@mail.iap.ac.cn](mailto:kwu@mail.iap.ac.cn)) and Minqiang Zhou ([minqiang.zhou@mail.iap.ac.cn](mailto:minqiang.zhou@mail.iap.ac.cn))

1 **Table S1.** Definition of sub-sectors included in the four main sectors (electricity and heat production, industries and construction, transport,  
2 and residential and commercial) of the MEIC inventory.

| Sector in MEIC-global-CO <sub>2</sub> | Definition                                  |
|---------------------------------------|---------------------------------------------|
| Electricity and heat production       | Power generation                            |
|                                       | Heat (auto producer)                        |
|                                       | Heat (public)                               |
| Industries and construction           | Coal mines                                  |
|                                       | Oil and gas extraction                      |
|                                       | Blast furnaces                              |
|                                       | Gas works                                   |
|                                       | Gasification plants for biogases            |
|                                       | Coke ovens                                  |
|                                       | Patent fuel plants                          |
|                                       | BKB/peat briquette plants                   |
|                                       | Oil refineries                              |
|                                       | Coal liquefaction plants                    |
|                                       | Liquefaction (LNG) / regasification plants  |
|                                       | Gas-to-liquids (GTL) plants                 |
|                                       | Own use in electricity, CHP and heat plants |
|                                       | Charcoal production plants                  |
|                                       | Non-specified transformation industries     |
|                                       | Iron and steel                              |
|                                       | Non-ferrous metals                          |
|                                       | Chemicals                                   |
|                                       | Pulp and paper                              |
|                                       | Food and tobacco                            |
|                                       | Cement                                      |
|                                       | Other non-metallic minerals                 |
|                                       | Transport equipment                         |
|                                       | Machinery                                   |
|                                       | Mining and quarrying                        |
|                                       | Wood products                               |

|                            |                                       |
|----------------------------|---------------------------------------|
|                            | Construction                          |
|                            | Textile and leather                   |
|                            | Other non-specified industries        |
|                            | Process emissions in cement industry  |
| Transport                  | International aviation <sup>1</sup>   |
|                            | Domestic aviation                     |
|                            | Rail                                  |
|                            | International navigation <sup>1</sup> |
|                            | Domestic navigation                   |
|                            | Pipeline transport                    |
|                            | Other non-specified transport         |
|                            | Agriculture and forestry              |
|                            | Fishing                               |
|                            | Cars                                  |
|                            | Light duty trucks                     |
|                            | Buses                                 |
|                            | Heavy duty trucks                     |
|                            | Motorcycles                           |
|                            | Other fleet totals                    |
| Residential and commercial | Commercial and institutional          |
|                            | Residential (rural)                   |
|                            | Residential (urban)                   |
|                            | Non-specified sectors                 |
| 3                          |                                       |
| 4                          |                                       |

5 **Table S2.** Definition of sub-sectors in the four main sectors of EDGAR, CAMS, CEADs and GEMS.

| Emission inventory | Sector                          | Definition                                                                  |
|--------------------|---------------------------------|-----------------------------------------------------------------------------|
| EDGAR              | Electricity and heat production | Main Activity Electricity and Heat Production                               |
|                    |                                 | Petroleum Refining - Manufacture of Solid Fuels and Other Energy Industries |
|                    | Industries and construction     | Manufacturing Industries and Construction                                   |
|                    |                                 | Solid Fuels                                                                 |
|                    |                                 | Oil and Natural Gas                                                         |
|                    |                                 | Cement production                                                           |
|                    |                                 | Lime production                                                             |
|                    |                                 | Glass Production                                                            |
|                    |                                 | Other Process Uses of Carbonates                                            |
|                    |                                 | Chemical Industry                                                           |
|                    |                                 | Metal Industry                                                              |
|                    |                                 | Non-Energy Products from Fuels and Solvent Use                              |
|                    |                                 | Liming                                                                      |
|                    |                                 | Urea application                                                            |
|                    |                                 | Incineration and Open Burning of Waste                                      |
|                    |                                 | Fossil fuel fires                                                           |
|                    | Transport                       | Civil Aviation                                                              |
|                    |                                 | Road Transportation no resuspension                                         |
|                    |                                 | Railways                                                                    |
|                    |                                 | Water-borne Navigation                                                      |
|                    |                                 | Other Transportation                                                        |

|       |                                 |                                                                 |
|-------|---------------------------------|-----------------------------------------------------------------|
| CAMS  | Residential and commercial      | Residential and other sectors<br>Non-Specified                  |
|       | Electricity and heat production | Power generation                                                |
|       | Industries and construction     | Fugitives                                                       |
|       |                                 | Industrial process                                              |
|       |                                 | Refineries                                                      |
|       |                                 | Solid waste and waste water                                     |
|       |                                 | Solvents                                                        |
|       | Transport                       | Off Road transportation -China                                  |
|       |                                 | Road transportation                                             |
|       |                                 | Ships                                                           |
| CEADs | Residential and commercial      | Commercial<br>Residential                                       |
|       | Electricity and heat production | Production and Supply of Electric<br>Power, Steam and Hot Water |
|       | Industries and construction     | Coal Mining and Dressing                                        |
|       |                                 | Petroleum and Natural Gas<br>Extraction                         |
|       |                                 | Ferrous Metals Mining and<br>Dressing                           |
|       |                                 | Nonferrous Metals Mining and<br>Dressing                        |
|       |                                 | Nonmetal Minerals Mining and<br>Dressing                        |
|       |                                 | Other Minerals Mining and<br>Dressing                           |
|       |                                 | Logging and Transport of Wood<br>and Bamboo                     |
|       |                                 | Food Processing                                                 |
|       |                                 | Food Production                                                 |

Beverage Production  
Tobacco Processing  
Textile Industry  
Garments and Other Fiber Products  
Leather, Furs, Down and Related  
Products  
Timber Processing, Bamboo, Cane,  
Palm Fiber & Straw Products  
Furniture Manufacturing  
Papermaking and Paper Products  
Printing and Record Medium  
Reproduction  
Petroleum Processing and Coking  
Raw Chemical Materials and  
Chemical Products  
Medical and Pharmaceutical  
Products  
Chemical Fiber  
Rubber Products  
Plastic Products  
Nonmetal Mineral Products  
Smelting and Pressing of Ferrous  
Metals  
Smelting and Pressing of  
Nonferrous Metals  
Metal Products  
Ordinary Machinery  
Equipment for Special Purposes  
Transportation Equipment  
Electric Equipment and Machinery

|      |                                 |                                                                                                                                                                                                                                                     |
|------|---------------------------------|-----------------------------------------------------------------------------------------------------------------------------------------------------------------------------------------------------------------------------------------------------|
|      |                                 | Electronic and<br>Telecommunications Equipment<br>Instruments, Meters, Cultural and<br>Office Machinery<br>Other Manufacturing Industry<br>Scrap and waste<br>Production and Supply of Gas<br>Production and Supply of Tap<br>Water<br>Construction |
|      | Transport                       | Farming, Forestry, Animal<br>Husbandry, Fishery and Water<br>Conservancy<br>Transportation, Storage, Post and<br>Telecommunication Services                                                                                                         |
|      | Residential and commercial      | Cultural, Educational and Sports<br>Articles<br>Wholesale, Retail Trade and<br>Catering Services<br>Others<br>Urban<br>Rural                                                                                                                        |
| GEMS | Electricity and heat production | Power Generation                                                                                                                                                                                                                                    |
|      | Industries and construction     | Industrial Process                                                                                                                                                                                                                                  |
|      |                                 | Industrial Combustion                                                                                                                                                                                                                               |
|      | Transport                       | Transportation                                                                                                                                                                                                                                      |
|      |                                 | Agriculture                                                                                                                                                                                                                                         |
|      | Residential and commercial      | Commercial                                                                                                                                                                                                                                          |
|      |                                 | Residential Combustion                                                                                                                                                                                                                              |

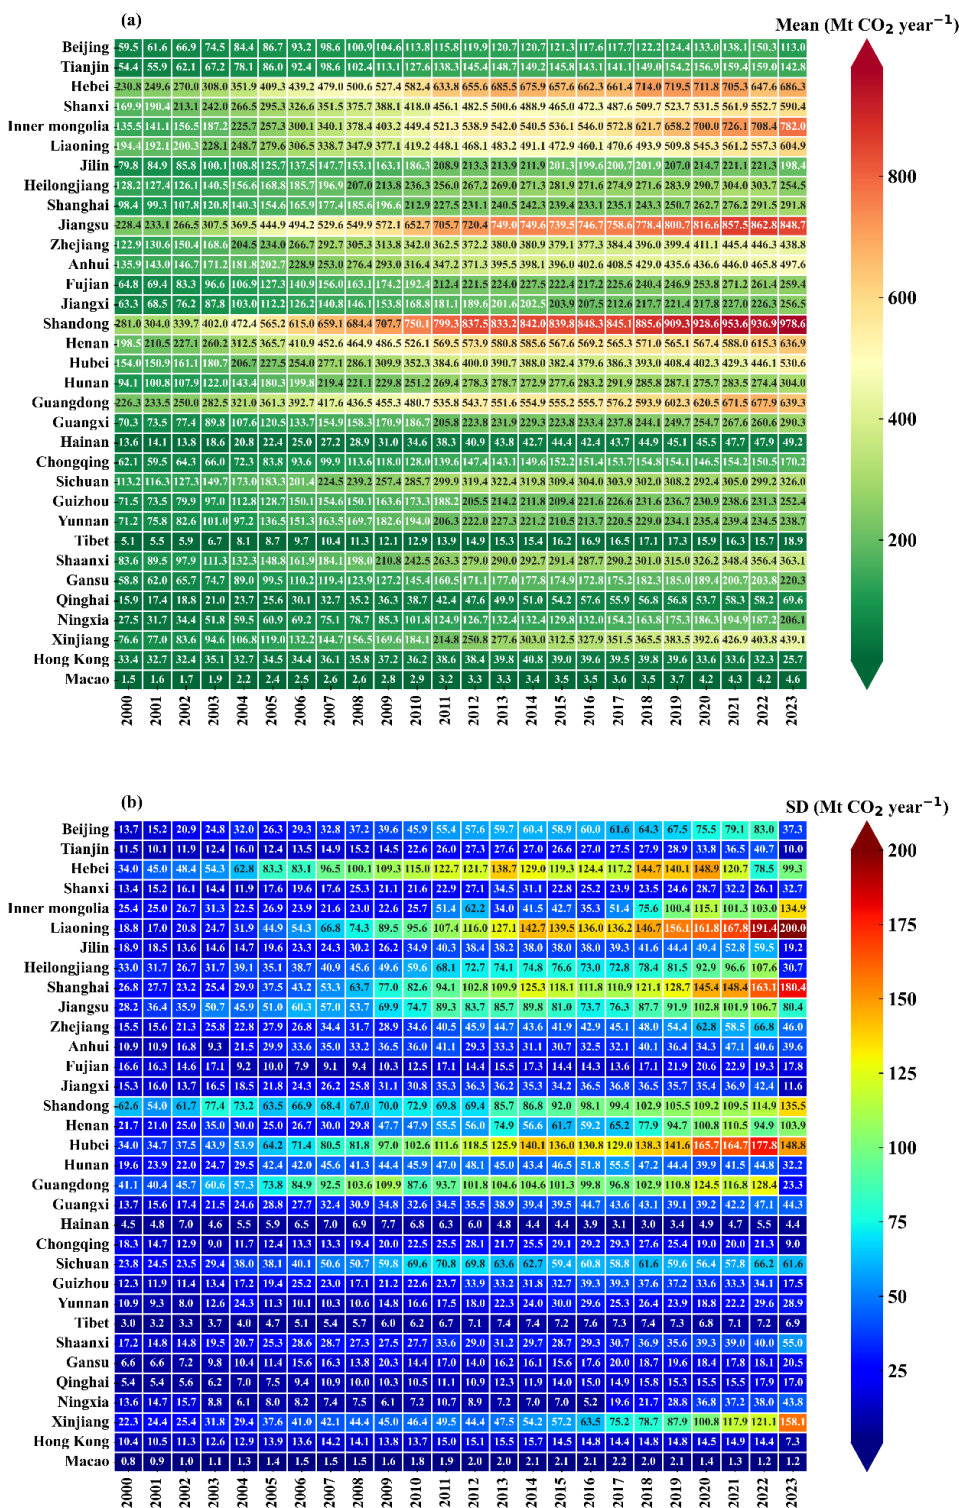



10  
11

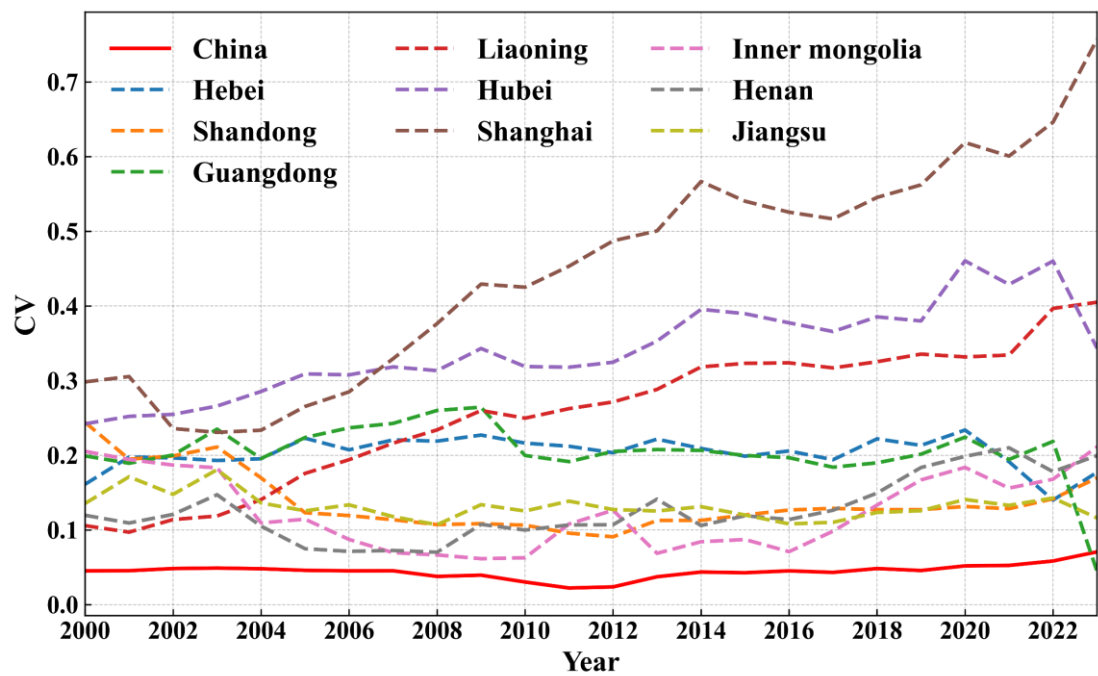

12  
13 **Figure S2.** Coefficient of variation (CV) of emissions at national level and for nine typical provinces.

14  
15
